# Supplementary material for: E46K-like α-synuclein mutants increase lipid interactions and disrupt membrane selectivity
Source: PubMed Central journal article supplement (PMC6597829; doi:10.1074/jbc.ra118.006551), 2019-05-02
Supplement: supp_RA118.006551_141724_2_supp_323605_pqtlkz.pdf [file supp_RA118.006551_141724_2_supp_323605_pqtlkz.pdf]

SUPPORTING INFORMATION: E46K-like  $\alpha$ -synuclein mutants increase lipid interactions and disrupt membrane selectivity

**Matteo Rovere<sup>1</sup>, Alex E. Powers<sup>1</sup>, Julia C. Pitino<sup>1</sup>, Luis Fonseca-Ornelas<sup>1</sup>, Dushyant S. Patel<sup>1</sup>, Alessandro Achille<sup>2</sup>, Ralf Langen<sup>3</sup>, Jobin Varkey<sup>3</sup>, Tim Bartels<sup>1,4\*</sup>.**

From the <sup>1</sup>Ann Romney Center for Neurologic Diseases, Brigham and Women's Hospital and Harvard Medical School, Boston MA, 02115, USA; the <sup>2</sup>Department of Computer Science, University of California, Los Angeles, Los Angeles CA, 90095, USA; the <sup>3</sup>Zilkha Neurogenetic Institute, University of Southern California, Los Angeles CA, 90033, USA; <sup>4</sup>the Dementia Research Institute, University College London, London, WC1E 6BT, UK

\*To whom correspondence should be addressed: Dementia Research Institute, University College London, London, Gower Street, Cruciform Building Wing 2.4, WC1E 6BT, UK. Phone: +44-20-31086814; E-mail: [t.bartels@ucl.ac.uk](mailto:t.bartels@ucl.ac.uk)

Figures S1–S6 and Tables S1–S3.

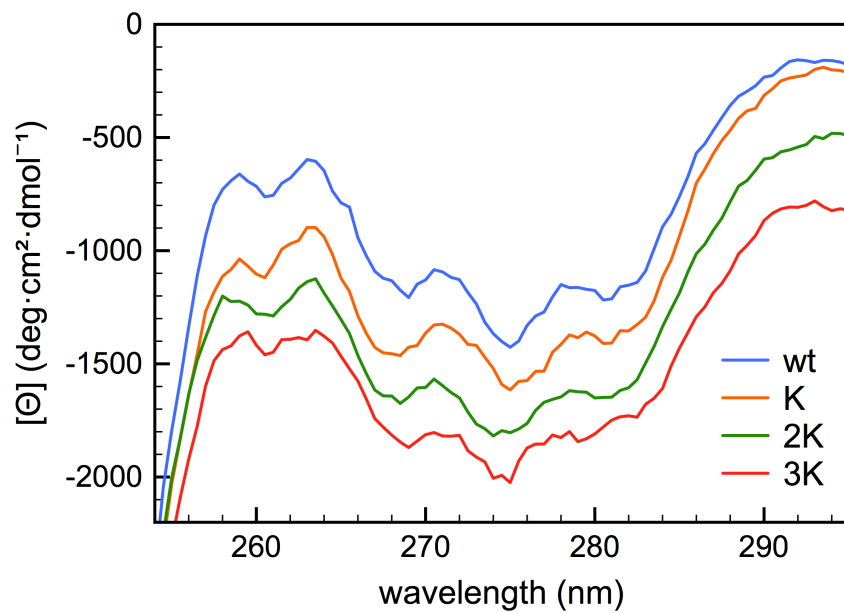

FIGURE S1. Near-UV CD spectra of 90  $\mu\text{M}$  wt, K, 2K and 3K  $\alpha\text{Syn}$  in 10 mM  $\text{NH}_4\text{Ac}$ , pH 7.40, measured at 25°C. Spectra are arbitrarily offset for easier comparison. No clear differences among the E46K-like mutants are observed.

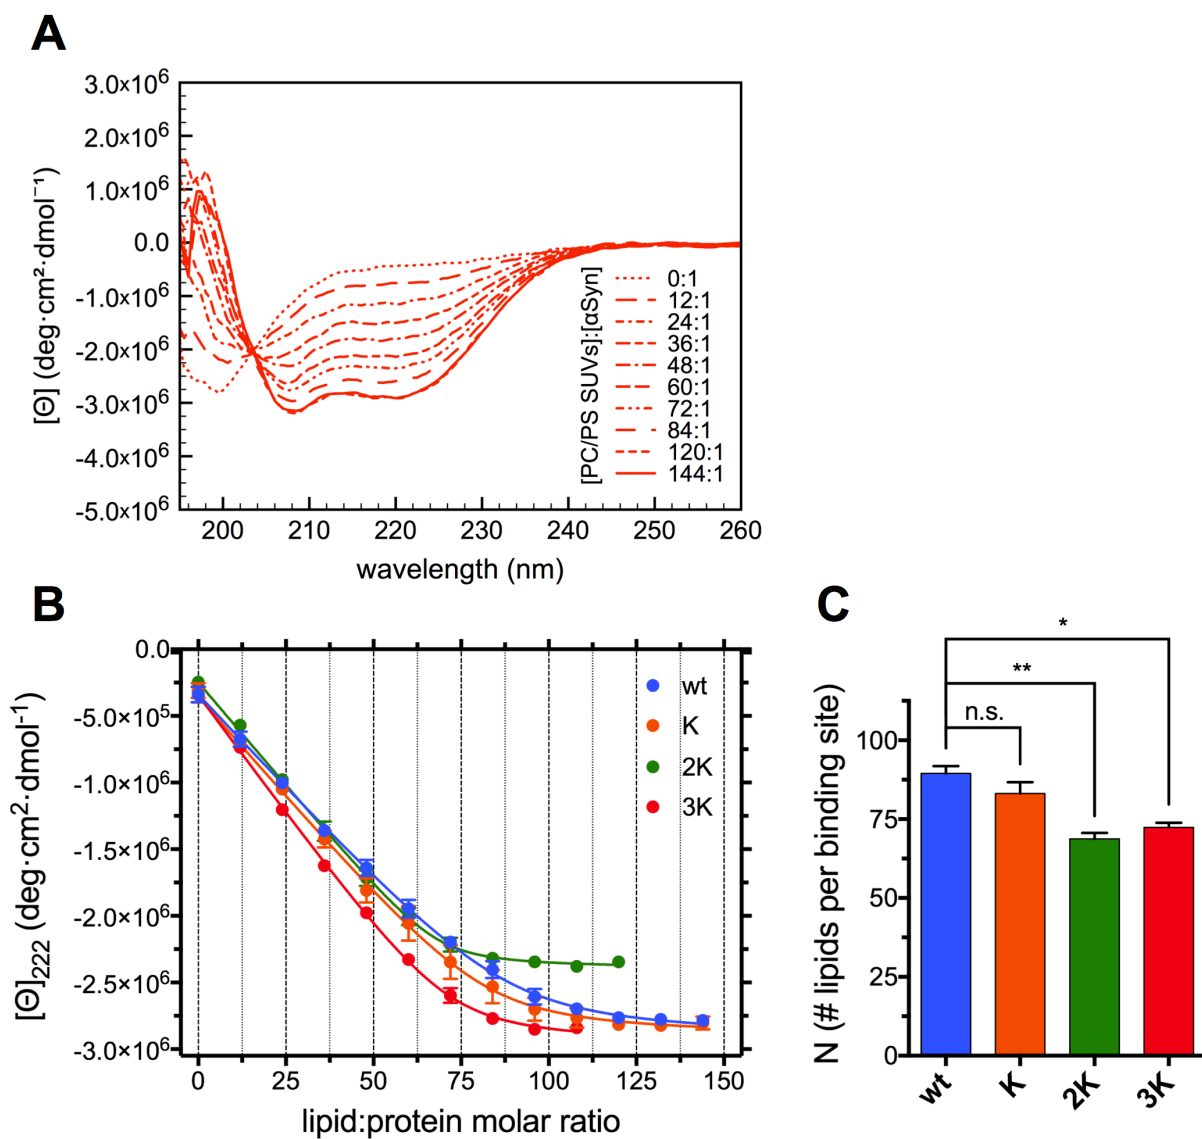

FIGURE S2. *A*, Representative far-UV CD spectra from a titration of 9.7  $\mu$ M wt  $\alpha$ Syn (in 9.7 mM  $\text{NH}_4\text{Ac}$ , 150 mM NaCl, pH 7.40) with 5.8 mM 70:30 POPC:DOPS SUVs, measured at 25°C. *B*, Titration curves obtained from raw CD data after extracting the molar ellipticity at 222 nm and graphing it against the lipid:protein molar ratio at each point of the titration. Datapoints are shown along with their SEM (from  $n=3-6$  independent titrations) and their best fit with an  $N$  independent binding sites model (see Experimental Procedures). *C*, Histogram of the  $N$  values (along with their SEM,  $n=3-6$ ) obtained from the best fit of the titration curves with an  $N$  independent binding sites model. Decreasing  $N$ s indicate increased binding (or “avidity”, see Results).

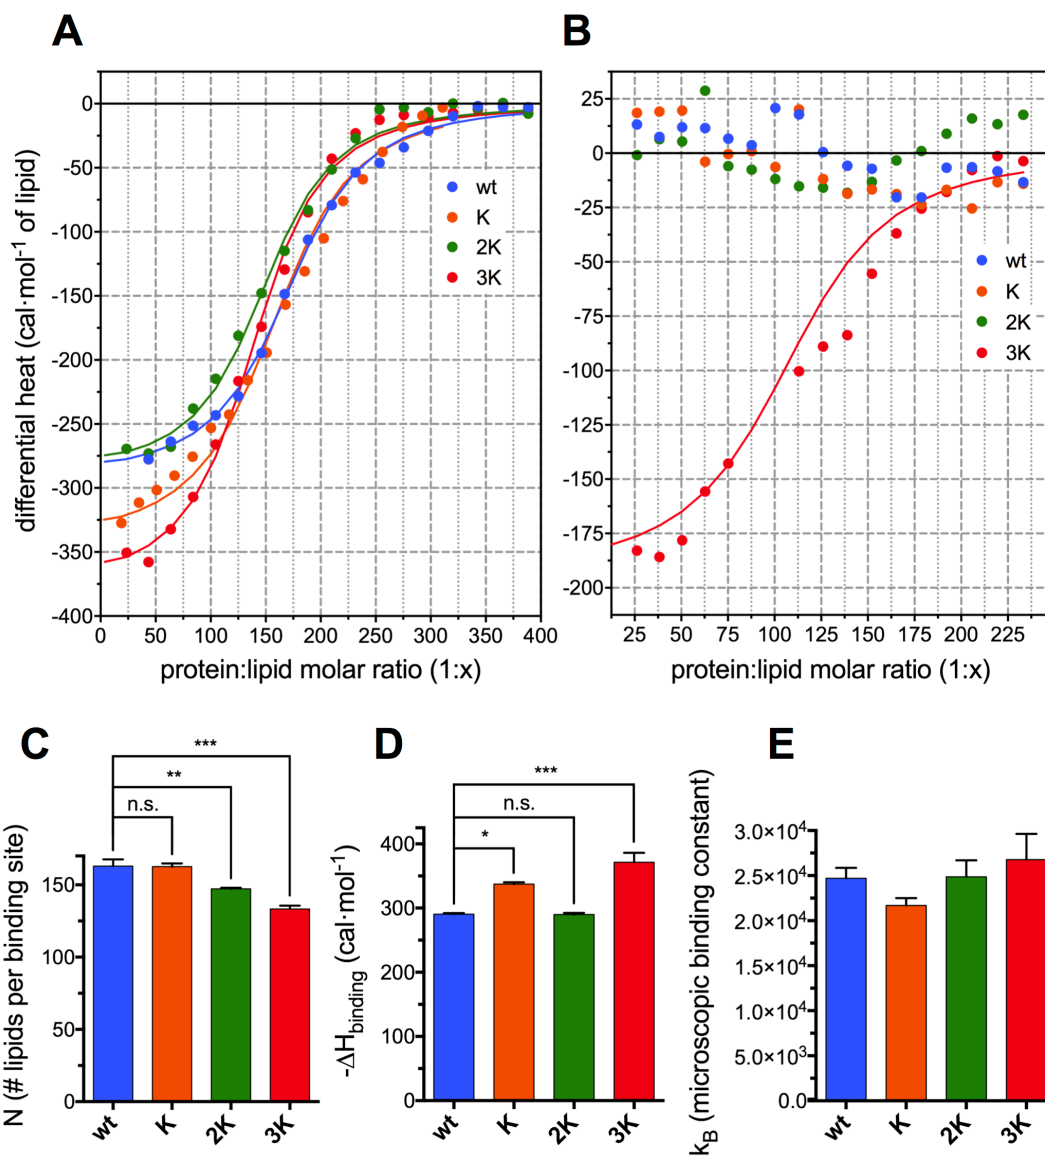

FIGURE S3. *A*, Representative ITC binding isotherms of 5  $\mu$ M wt, K, 2K, and 3K  $\alpha$ Syn (in 10 mM  $\text{NH}_4\text{Ac}$ , pH 7.40) with 6 mM 70:30 POPC:DOPS SUVs, measured at 25°C. Datapoints are shown along with their best fit with an  $N$  independent binding sites model (*see* Experimental Procedures and Table S3). *B*, Representative ITC binding isotherms of 5  $\mu$ M wt, K, 2K, and 3K  $\alpha$ Syn (in 10 mM  $\text{NH}_4\text{Ac}$ , pH 7.40) with 6 mM 52.5:17.5:30 POPC:DOPS:cholesterol SUVs, measured at 25°C. 3K  $\alpha$ Syn datapoints are shown along with their best fit with an  $N$  independent binding sites model (*see* Experimental Procedures and Table S3). *C*, Histogram of the  $N$  values (along with their SEM,  $n=3$ ) obtained from the best fit of the titration curves with an  $N$  independent binding sites model. Decreasing  $N$ s indicate increased binding (or “avidity”, *see* Results). *D*, Histogram of the  $\Delta H$  ( $-\Delta H$ ) values (along with their SEM,  $n=3$ ) obtained from the best fit of the titration curves with an  $N$  independent binding sites model. *E*, Histogram of the  $k_B$  values (along with their SEM,  $n=3$ ) obtained from the best fit of the titration curves with an  $N$  independent binding sites model.

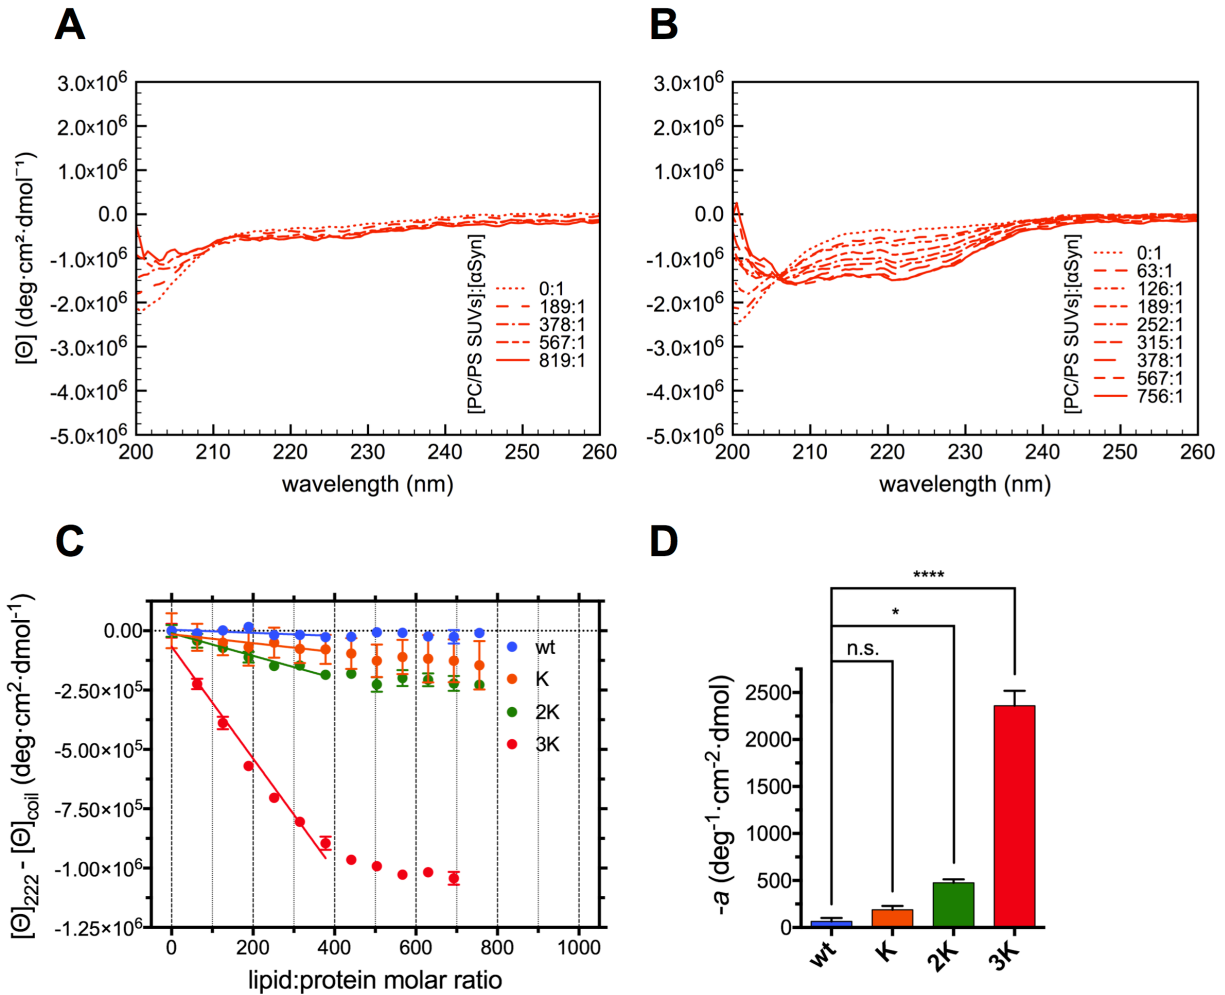

FIGURE S4. Representative far-UV CD spectra from a titration of 9.7  $\mu\text{M}$  wt (A) and 3K (B)  $\alpha$ Syn (in 9.7 mM  $\text{NH}_4\text{Ac}$ , 150 mM NaCl, pH 7.40) with 9.7 mM 70:30 POPC:DOPS LUVs, measured at 25°C. No binding is observed in “high-salt” conditions with wt  $\alpha$ Syn. C, Titration curves obtained from raw CD data after extracting the molar ellipticity at 222 nm, subtracting the unfolded ellipticity signal at the same wavelength and graphing it against the lipid:protein molar ratio at each point of the titration. Datapoints are shown along with their SEM (from  $n=3$  independent titrations) and the best linear regression of the first 7 datapoints ( $[\Theta]_{222} - [\Theta]_{\text{coil}} = a \cdot (\text{lipid:protein molar ratio}) + b$ ). D, Histogram of the slopes  $-a$  (along with their SEM,  $n=3$ ) obtained from the linear regression of the titration curves. Increasing slopes ( $-a$ ) indicate increased binding propensity.

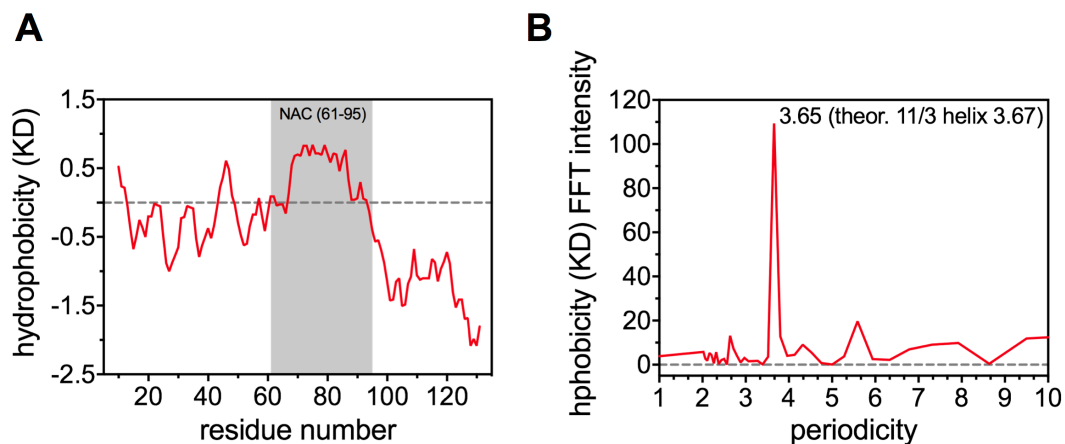

FIGURE S5. *A*, Hydrophobicity plot of the primary sequence of wt  $\alpha$ Syn (1-140), calculated using the hydrophobicity index values of Kyte and Doolittle and averaged over a 21-residue moving window. The hydrophobicity of the primary sequence of  $\alpha$ Syn highlights its key features: the amphipathic N-terminal region (1-95), with the slightly hydrophobic NAC domain (61-95, highlighted in gray), and the polar, negatively charged C-terminus (96-140). *B*, Fast Fourier Transform (FFT) analysis of the hydrophobicity of the N-terminus (1-95) of wt  $\alpha$ Syn (again, the hydrophobicity index values of Kyte and Doolittle were used). The FFT shows a sharp maximum corresponding to the periodicity of an 11/3 helix (measured as number of residues per helix turn).

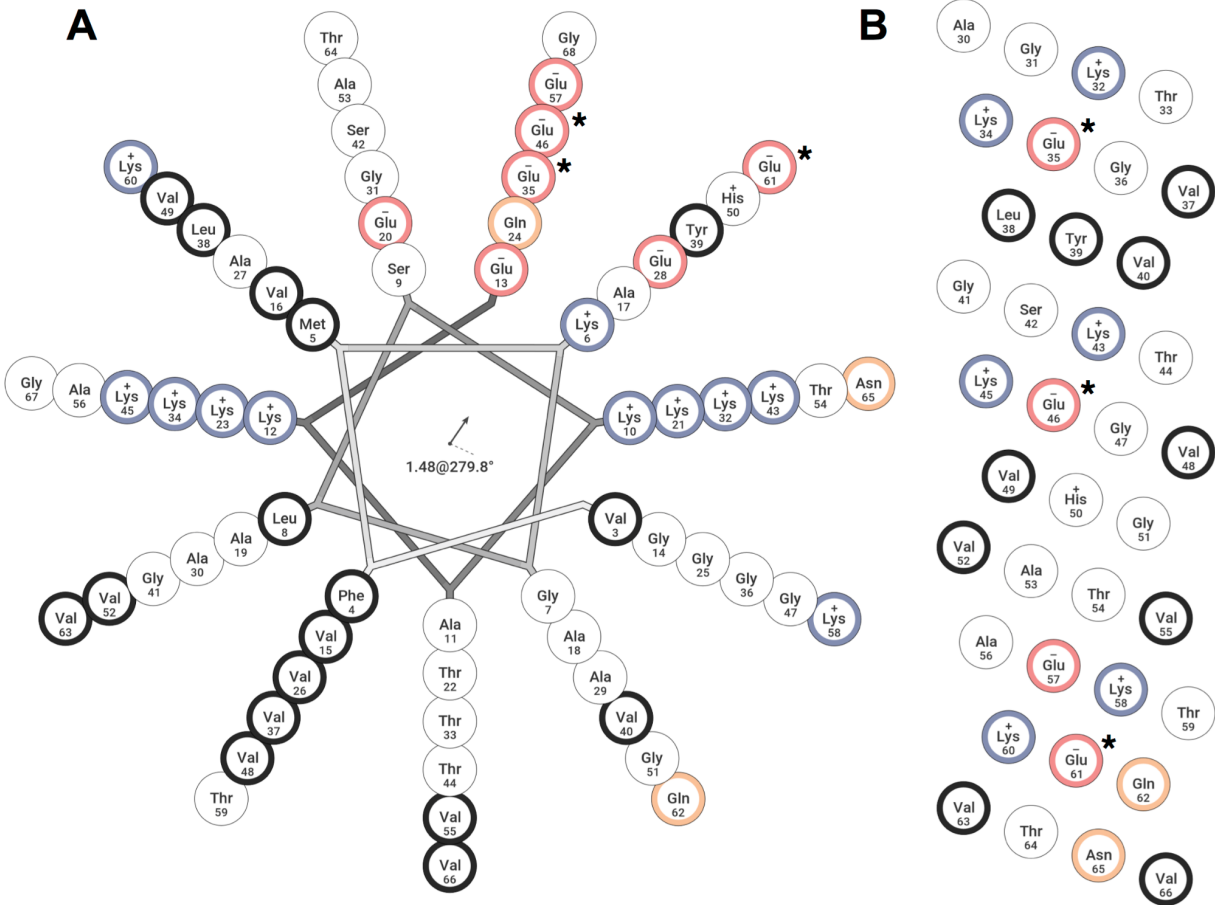

FIGURE S6. *A*, Schiffer-Edmundson helical wheel diagram of wt  $\alpha$ Syn's N-terminal region (3-68), with the amino acids color-coded according to their polarity (Blue: positively charged aa, Red: negatively charged aa, Yellow: polar aa, White: neutral aa, Black: apolar aa). E61 is shown to be slightly closer to the membrane surface and thus comparatively better positioned to establish ionic bonds with the negatively charged lipid heads upon E-to-K mutation. *B*, Helical net diagram of the segment 30-66 of wt  $\alpha$ Syn, color-coded as in *A*. In addition to the helical orientation, the local environment of E61 is also different from E35 and E46, suggesting that the rearrangement of electrostatic and/or hydrogen bonds upon E-to-K mutation could explain an increased 11/3 helix stability and membrane avidity.

TABLE S1 (.xlsx).  $^1\text{H}$ - $^{15}\text{N}$  HSQC spectral parameters (assigned chemical shifts and chemical shift perturbations) for Figs. 2-3.



|                                        | <b>Hydrodynamic Radius (nm)</b> |
|----------------------------------------|---------------------------------|
| POPC:DOPS SUVs (sonicated)             | 16.4±0.9                        |
| POPC:DOPS:cholesterol SUVs (sonicated) | 17.8±0.1                        |
| POPC:DOPS LUVs (extruded, 0.1 μm)      | 48±2                            |

TABLE S2. DLS-measured hydrodynamic radii (along with their SEM,  $n=3$ ) of freshly-prepared 5 mM 70:30 POPC:DOPS SUVs, 52.5:17.5:30 POPC:DOPS:cholesterol SUVs and 70:30 POPC:DOPS LUVs (extruded through a 0.1-μm polycarbonate membrane), measured at 20°C.

| <b>CD</b>                 | $N$                             | $k_B$                           | $-[\Theta]_{helix}^{222} (deg \cdot cm^2 \cdot dmoI^{-1})$ |                                              |
|---------------------------|---------------------------------|---------------------------------|------------------------------------------------------------|----------------------------------------------|
| <i>wt</i> PC:PS SUVs      | 157±5                           | $(7±4) \cdot 10^4$              | $(3.59±0.07) \cdot 10^6$                                   |                                              |
| <b>K</b> PC:PS SUVs       | 151±4 (n.s.)                    | $(8±4) \cdot 10^4$ (n.s.)       | $(3.83±0.08) \cdot 10^6$ (n.s.)                            |                                              |
| <b>2K</b> PC:PS SUVs      | 148±4 (n.s.)                    | $(8±4) \cdot 10^4$ (n.s.)       | $(3.74±0.05) \cdot 10^6$ (n.s.)                            |                                              |
| <b>3K</b> PC:PS SUVs      | 128±3 (**)                      | $(1.1±0.5) \cdot 10^4$ (n.s.)   | $(3.5±0.1) \cdot 10^6$ (n.s.)                              |                                              |
| <i>wt</i> PC:PS:chol SUVs | 164±3                           | $(8±2) \cdot 10^4$              | $(3.15±0.05) \cdot 10^6$                                   |                                              |
| <b>K</b> PC:PS:chol SUVs  | 165±3 (n.s.)                    | $(8±3) \cdot 10^4$ (n.s.)       | $(3.73±0.04) \cdot 10^6$ (**)                              |                                              |
| <b>2K</b> PC:PS:chol SUVs | 167±3 (n.s.)                    | $(6±2) \cdot 10^4$ (n.s.)       | $(3.44±0.04) \cdot 10^6$ (n.s.)                            |                                              |
| <b>3K</b> PC:PS:chol SUVs | 133±3 (***)                     | $(9±3) \cdot 10^4$ (n.s.)       | $(3.2±0.2) \cdot 10^6$ (n.s.)                              |                                              |
| <i>wt</i> PC:PS SUVs+NaCl | 90±2                            | $(4±2) \cdot 10^4$              | <i>N/A</i>                                                 |                                              |
| <b>K</b> PC:PS SUVs+NaCl  | 83±4 (n.s.)                     | $(5±4) \cdot 10^4$ (n.s.)       | <i>N/A</i>                                                 |                                              |
| <b>2K</b> PC:PS SUVs+NaCl | 69±2 (**)                       | $(1.3±0.9) \cdot 10^5$ (n.s.)   | <i>N/A</i>                                                 |                                              |
| <b>3K</b> PC:PS SUVs+NaCl | 72±2 (*)                        | $(6±3) \cdot 10^4$ (n.s.)       | <i>N/A</i>                                                 |                                              |
| <i>wt</i> PC:PS LUVs      | $(8.2±0.2) \cdot 10^2$          | $(1.0±0.2) \cdot 10^3$          | $(2.54±0.06) \cdot 10^6$                                   |                                              |
| <b>K</b> PC:PS LUVs       | $(6.3±0.3) \cdot 10^2$ (**)     | $(1.4±0.5) \cdot 10^3$ (n.s.)   | $(2.65±0.09) \cdot 10^6$ (n.s.)                            |                                              |
| <b>2K</b> PC:PS LUVs      | $(3.9±0.3) \cdot 10^2$ (****)   | $(1.3±0.4) \cdot 10^3$ (n.s.)   | $(2.85±0.07) \cdot 10^6$ (*)                               |                                              |
| <b>3K</b> PC:PS LUVs      | $(2.6±0.2) \cdot 10^2$ (****)   | $(3±1) \cdot 10^3$ (n.s.)       | $(2.93±0.06) \cdot 10^6$ (*)                               |                                              |
| <b>ITC</b>                | $N$                             | $k_B$                           | $-\Delta H (cal \cdot moI^{-1})$                           | $\Delta S (cal \cdot moI^{-1} \cdot K^{-1})$ |
| <i>wt</i> PC:PS SUVs      | 163±5                           | $(2.5±0.1) \cdot 10^4$          | 290±2                                                      | 19.1±0.1                                     |
| <b>K</b> PC:PS SUVs       | 163±2 (n.s.)                    | $(2.17±0.08) \cdot 10^4$ (n.s.) | 338±3 (*)                                                  | 18.7±0.1 (n.s.)                              |
| <b>2K</b> PC:PS SUVs      | 147±1 (*)                       | $(2.5±0.2) \cdot 10^4$ (n.s.)   | 290±2 (n.s.)                                               | 19.1±0.2 (n.s.)                              |
| <b>3K</b> PC:PS SUVs      | 133±2 (***)                     | $(2.7±0.3) \cdot 10^4$ (n.s.)   | $(3.7±0.1) \cdot 10^2$ (***)                               | 19.0±0.3 (n.s.)                              |
| <b>3K</b> PC:PS:chol SUVs | 95±8 (N/A)                      | $(2.3±0.3) \cdot 10^4$ (N/A)    | $(1.7±0.1) \cdot 10^2$ (N/A)                               | 19.3±0.3 (N/A)                               |
| <b>CLEARANCE KINETICS</b> | $t_{1/2}^{slow (abs)} (s^{-1})$ | $t_{1/2}^{fast (abs)} (s^{-1})$ | $t_{1/2}^{slow (CD)} (s^{-1})$                             | $t_{1/2}^{fast (CD)} (s^{-1})$               |
| <i>wt</i> PC:PG MLVs      | (818.3, 939.7)                  | (88.5, 102.2)                   | (926.0, 1046.0)                                            | (125.6, 145.9)                               |
| <b>K</b> PC:PG MLVs       | (712.3, 806.5)                  | (61.7, 70.6)                    | (615.2, 666.7)                                             | (72.2, 84.9)                                 |
| <b>2K</b> PC:PG MLVs      | (305.3, 458.8)                  | (79.5, 113.3)                   | (300.9, 356.3)                                             | (38.4, 64.8)                                 |
| <b>3K</b> PC:PG MLVs      | (289.4, 343.9)                  | (23.6, 35.6)                    | (419.1, 523.9)                                             | (46.8, 67.2)                                 |

TABLE S3. Summary table of the best-fit model parameters. CD-monitored (222-nm ellipticity) titrations of *wt*, **K**, **2K**, and **3K**  $\alpha$ Syn with 70:30 POPC:DOPS SUVs, 52.5:17.5:30 POPC:DOPS:cholesterol SUVs, 70:30 POPC:DOPS SUVs in 150 mM NaCl, and 70:30 POPC:DOPS LUVs; best fits obtained with an  $N$  independent binding sites model ( $n=3$ , SEMs are shown). ITC binding isotherms of *wt*, **K**, **2K**, and **3K**

$\alpha$ Syn with 70:30 POPC:DOPS SUVs and 3K  $\alpha$ Syn with 52.5:17.5:30 POPC:DOPS:cholesterol SUVs; best fits obtained with an  $N$  independent binding sites model ( $n=3$ , SEMs are shown). Vesicle clearance kinetics of 90:10 POPC:POPG MLV dispersions by wt, K, 2K, and 3K  $\alpha$ Syn, monitored both by absorbance at 500 nm and by CD (222-nm ellipticity); best fits obtained with a two-phase exponential decay model (95% CIs are shown). Statistical significance was determined by ordinary one-way ANOVA followed by Sidak's multiple comparisons test (vs. wt  $\alpha$ Syn), with a single pooled variance; n.s.  $p>0.05$ , \*  $p\leq 0.05$ , \*\*  $p\leq 0.01$ , \*\*\*  $p\leq 0.001$ , \*\*\*\*  $p\leq 0.0001$ .
